# Supplementary material for: Modelling salinity in river systems using hybrid process and data-drivenmodels
Source: Copernicus journal article supplement (doi:10.5194/hess-2017-571), 2017-09-25
Supplement: Supplementary file [file hess-2017-571-AC2-supplement.pdf]

## **Response to referee comments on “Modelling salinity in river systems using hybrid process and data-driven models”, by Jason M. Hunter et al.**

5 Note: This document contains the authors’ responses to the comments of Referee #2. The comments made by the referee have been formatted in italic and coloured black, while our responses are upright and coloured blue.

### **Response to the comments of Referee #2**

10 *The paper presents a well thought out and executed approach to model salinity in a complex river environment.*

We are very grateful to the reviewer for their kind words, and for their recommendation that the paper be accepted as is.
